# Supplementary material
Source: PubMed Central journal article supplement (PMC3007180)
Supplement: supp_00866.2009_regu-figS9.pdf [file supp_00866.2009_regu-figS9.pdf]

SC-488 anti-ID1 Rabbit Polyclonal (Santa Cruz)

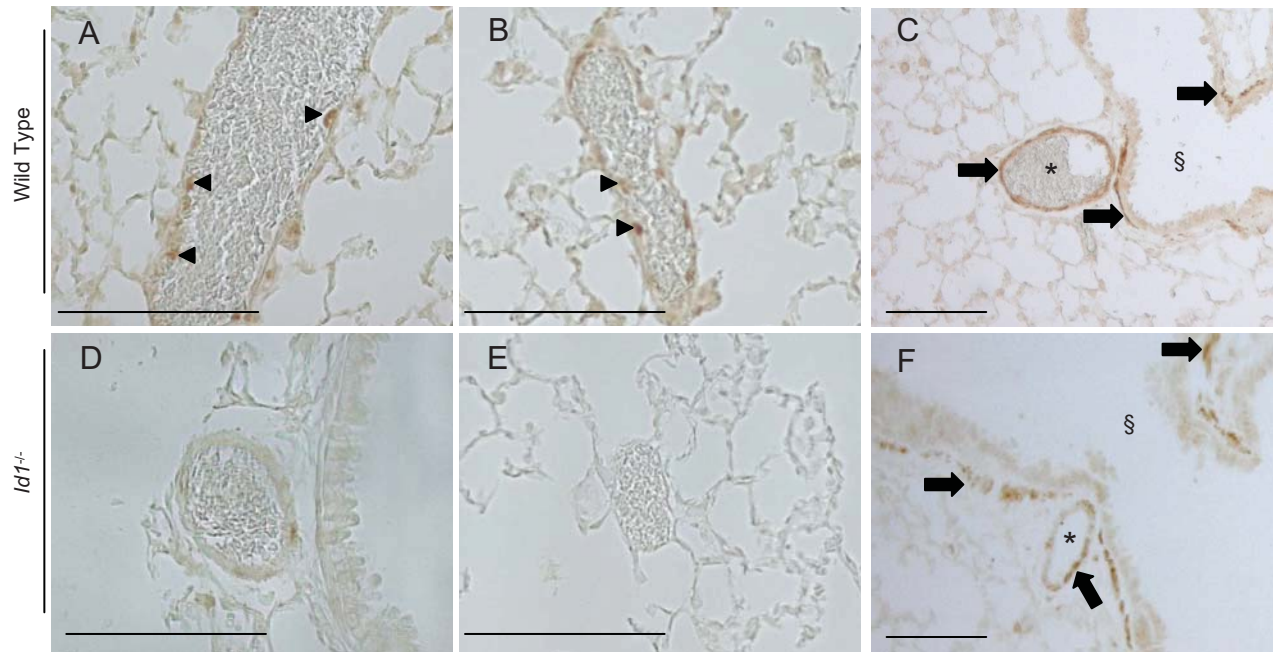

Clone 37-2 anti-ID1 Rabbit Monoclonal (BioCheck)

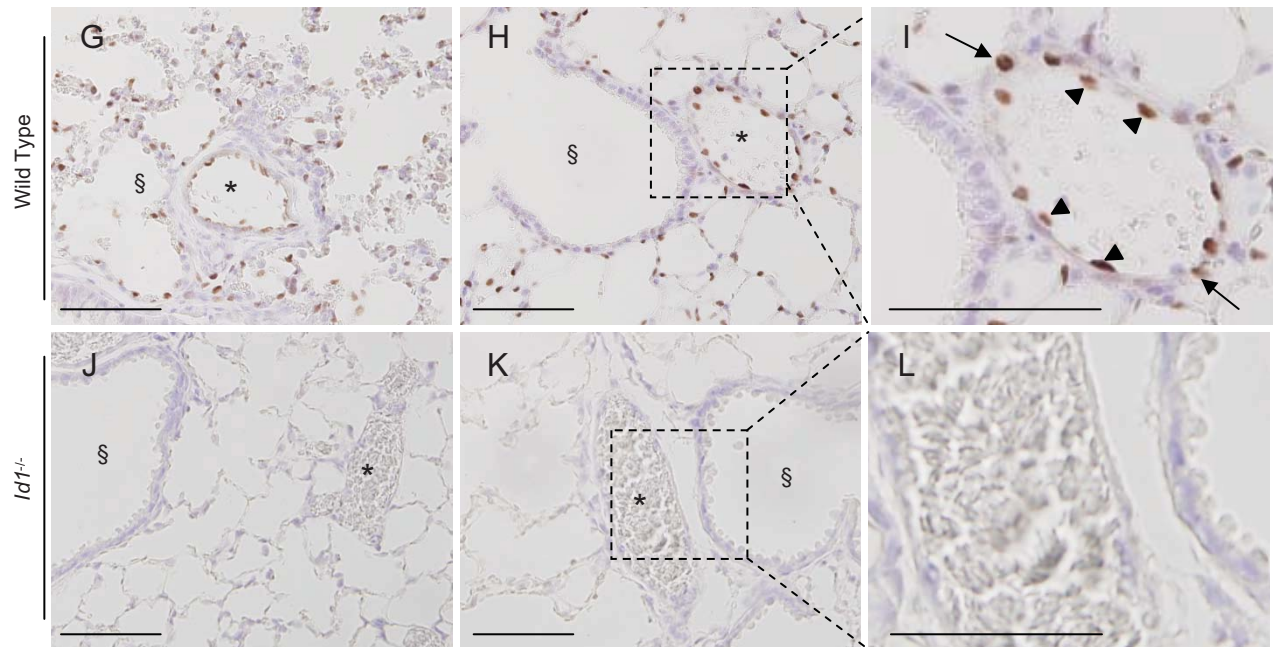

Supplemental Figure 9
