# Supplementary material
Source: PubMed Central journal article supplement (PMC3007180)

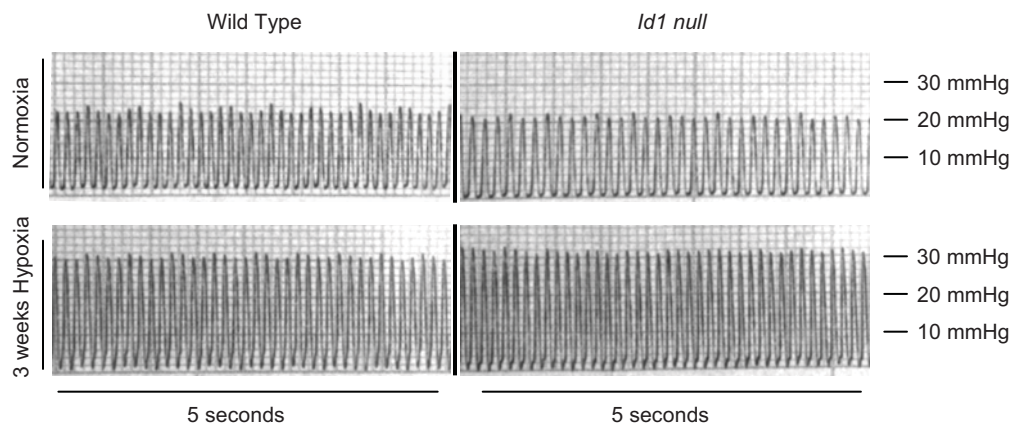

Supplemental Figure 1

Supplement: supp_00866.2009_regu-figS1.pdf [file supp_00866.2009_regu-figS1.pdf]

Clone 98-2 anti-ID2 Rabbit Monoclonal (BioCheck)

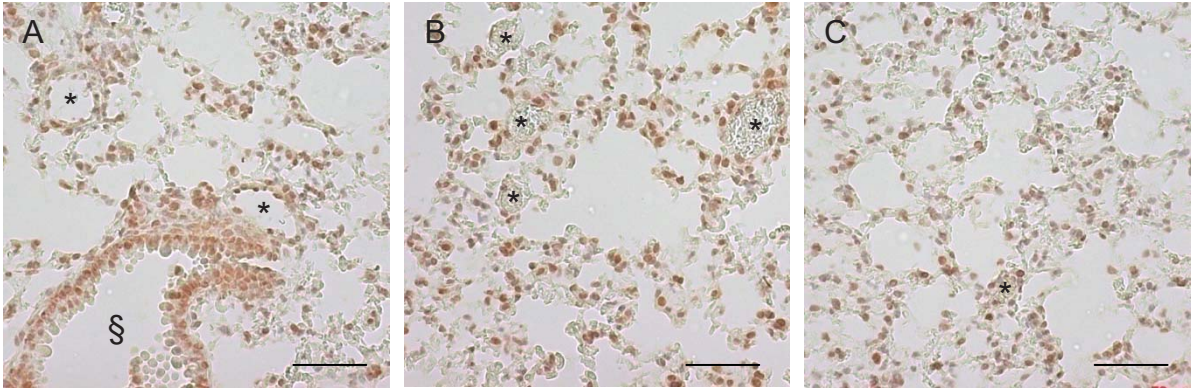

SC-489 anti-ID2 Rabbit Polyclonal (Santa Cruz)

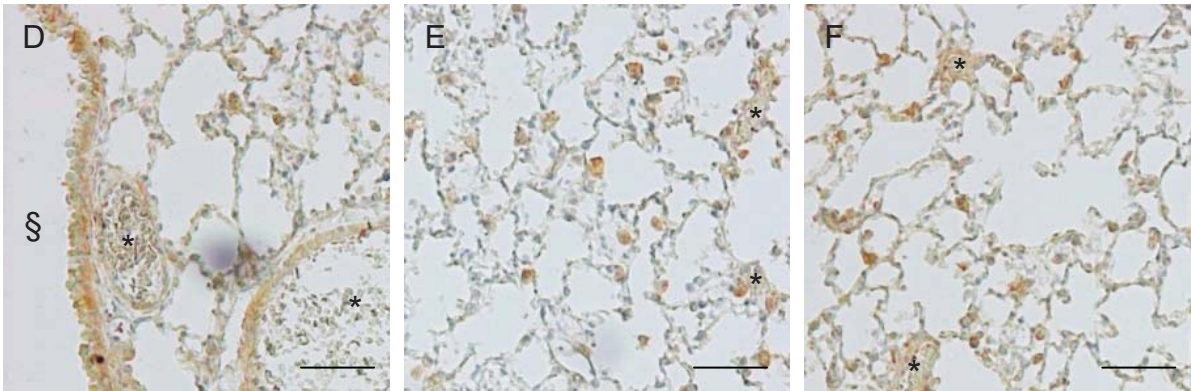

IgG Control

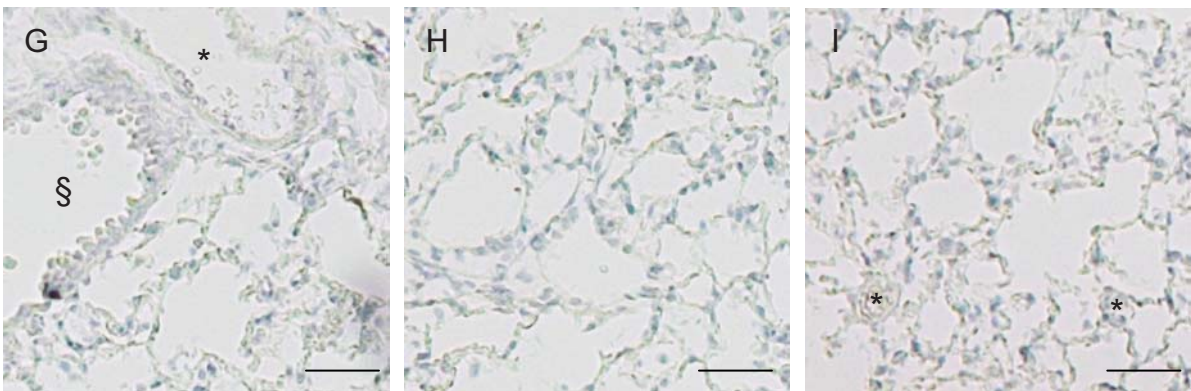

Supplement: supp_00866.2009_regu-figS11.pdf [file supp_00866.2009_regu-figS11.pdf]

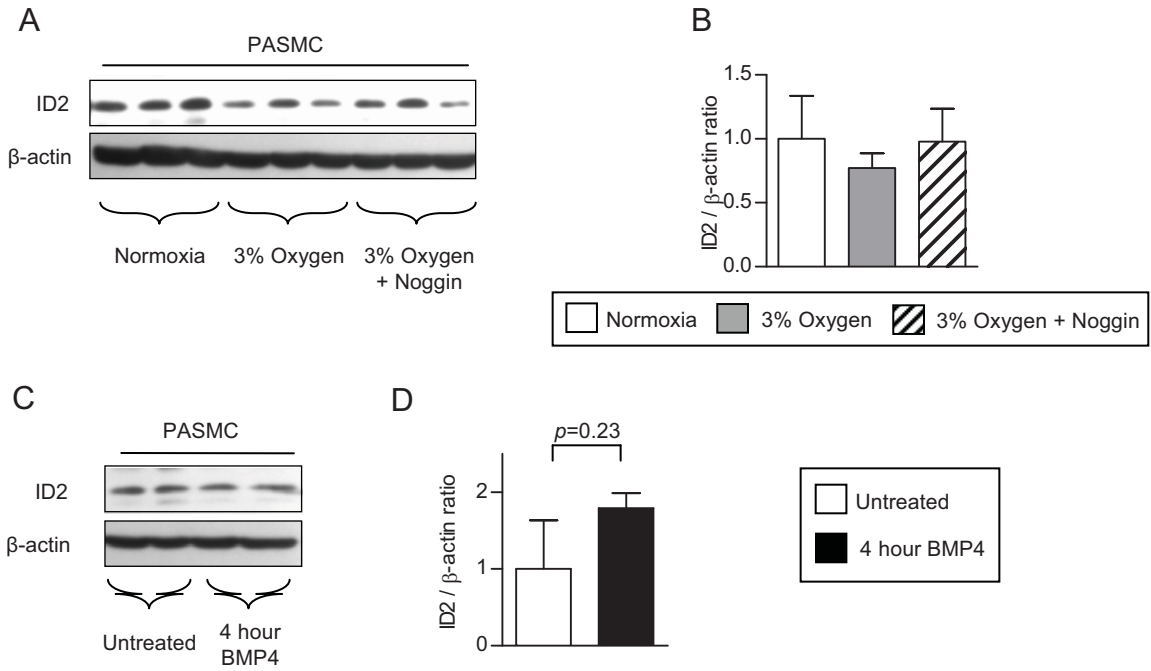

Supplemental Figure 12

Supplement: supp_00866.2009_regu-figS12.pdf [file supp_00866.2009_regu-figS12.pdf]

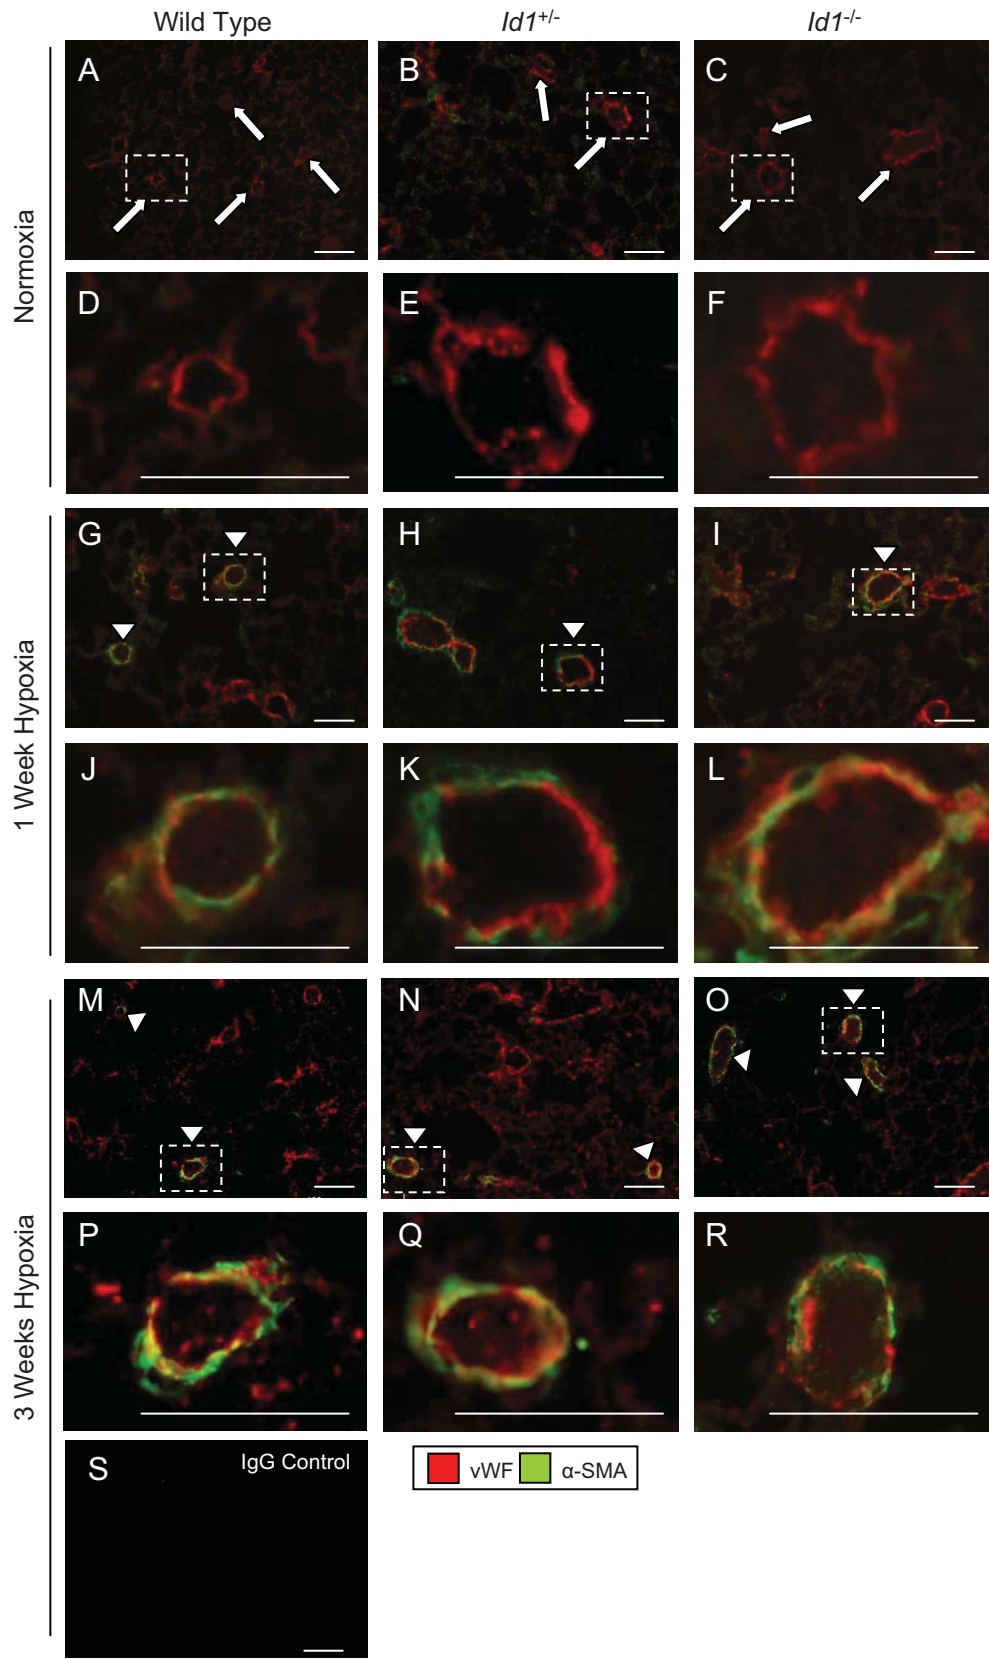

Supplemental Figure 2

Supplement: supp_00866.2009_regu-figS2.pdf [file supp_00866.2009_regu-figS2.pdf]

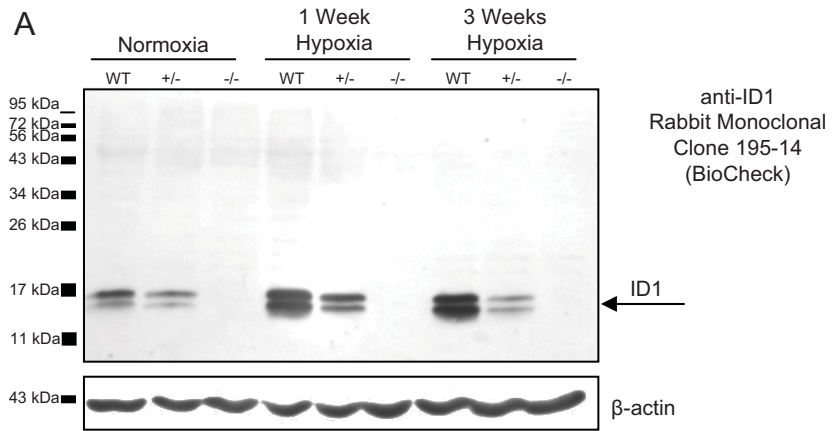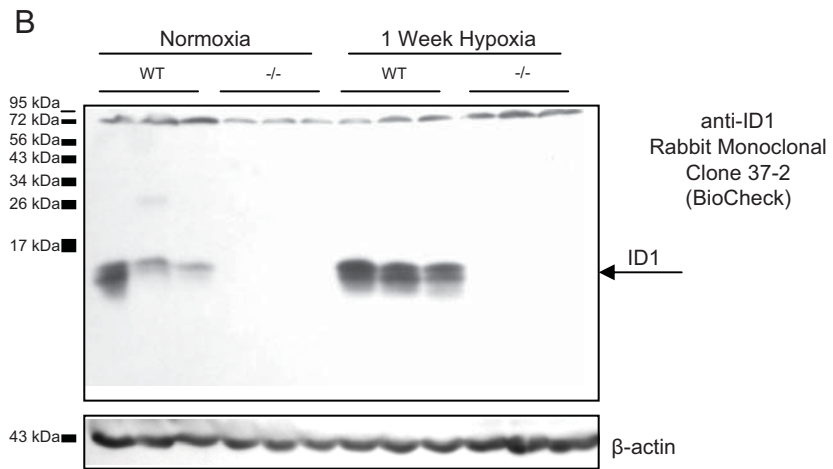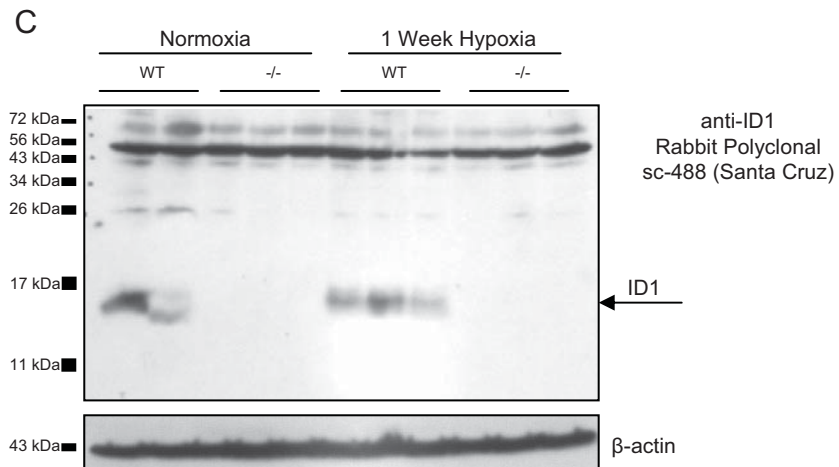

Supplemental Figure 3

Supplement: supp_00866.2009_regu-figS3.pdf [file supp_00866.2009_regu-figS3.pdf]

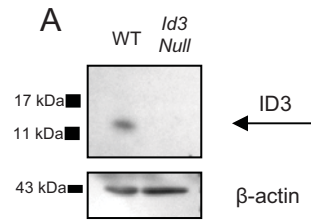

Clone 37-2 anti-ID3 Rabbit Monoclonal (BioCheck)

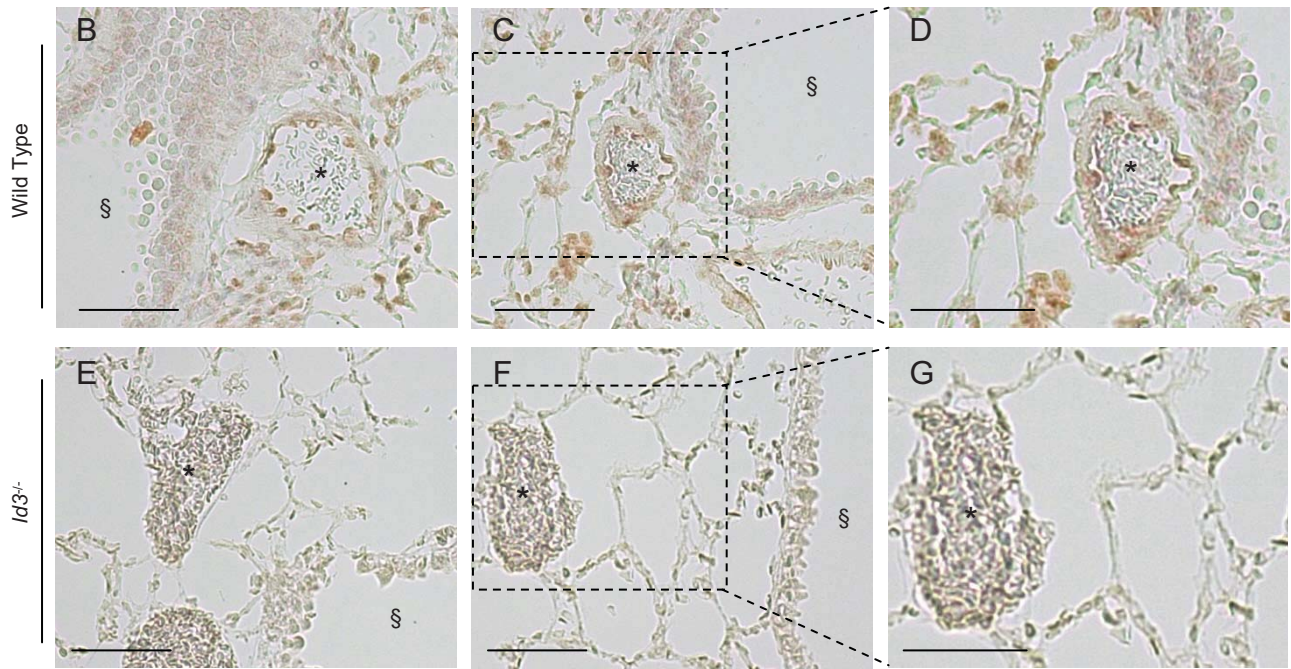

Supplement: supp_00866.2009_regu-figS4.pdf [file supp_00866.2009_regu-figS4.pdf]

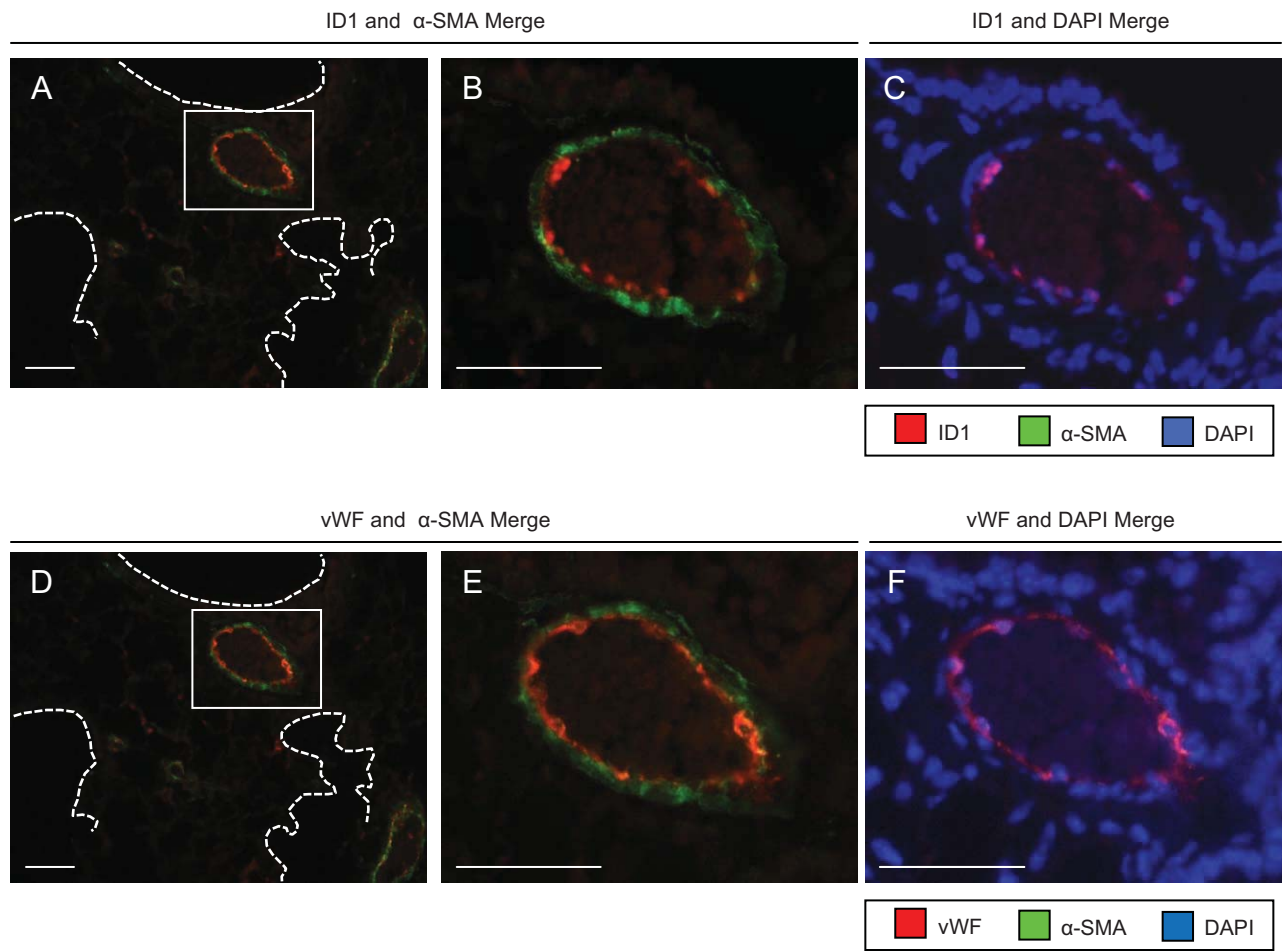

Supplemental Figure 5

Supplement: supp_00866.2009_regu-figS5.pdf [file supp_00866.2009_regu-figS5.pdf]

ID3 and  $\alpha$ -SMA Merge

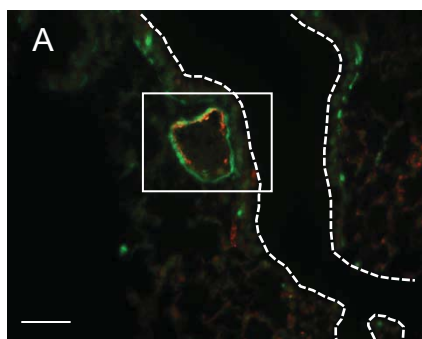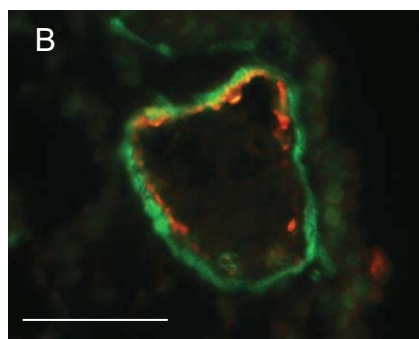

ID3 and DAPI Merge

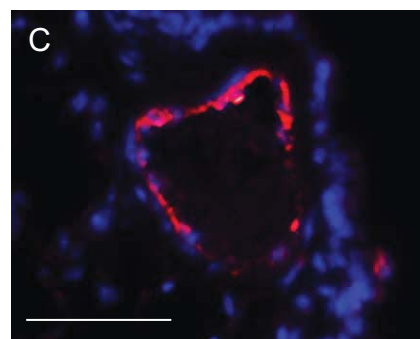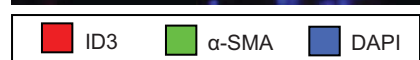

vWF and  $\alpha$ -SMA Merge

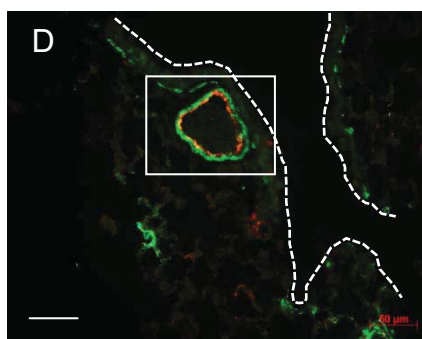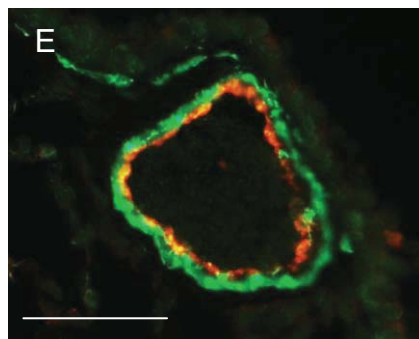

vWF and DAPI Merge

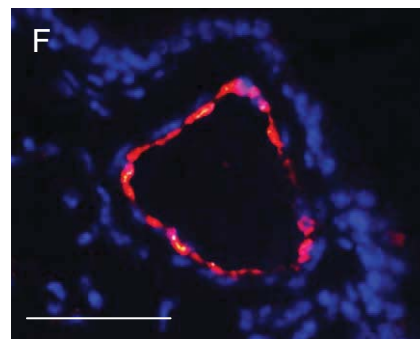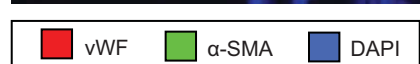

Supplement: supp_00866.2009_regu-figS6.pdf [file supp_00866.2009_regu-figS6.pdf]

ID2 and  $\alpha$ -SMA Merge

ID2 and DAPI Merge

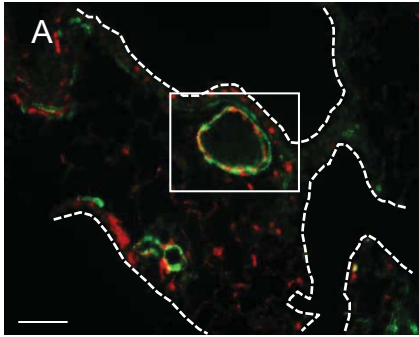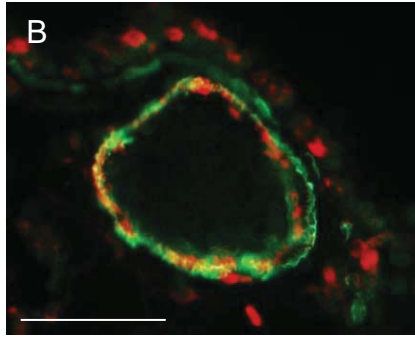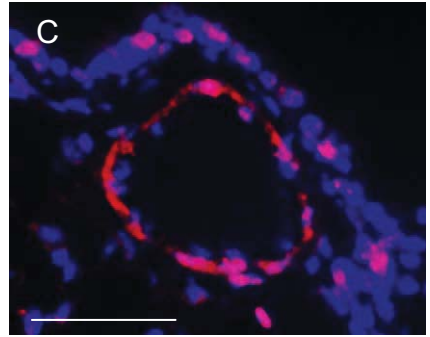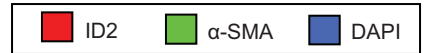

vWF and  $\alpha$ -SMA Merge

vWF and DAPI Merge

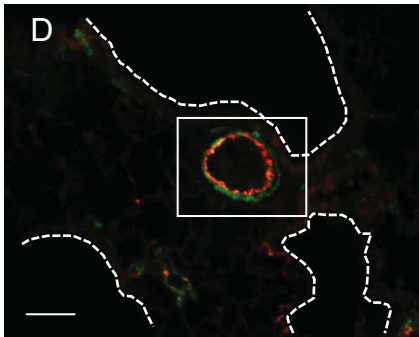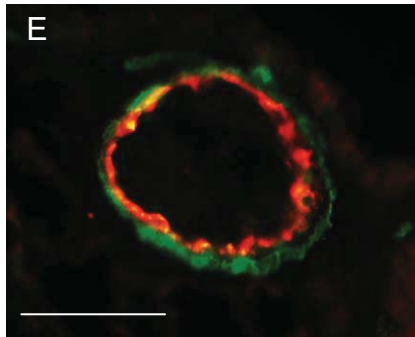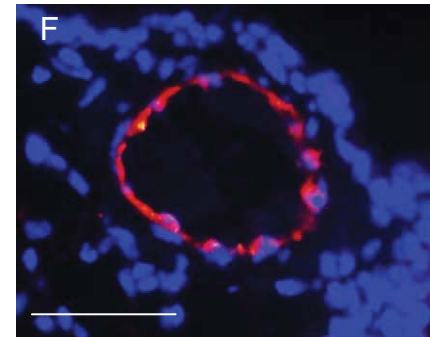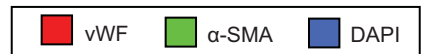

Supplement: supp_00866.2009_regu-figS7.pdf [file supp_00866.2009_regu-figS7.pdf]

A

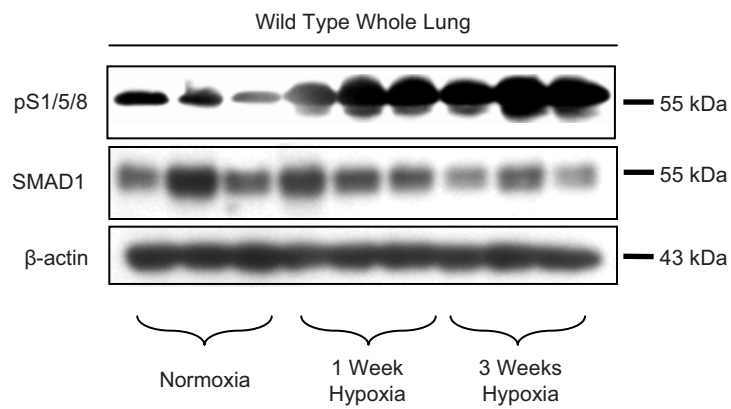

B

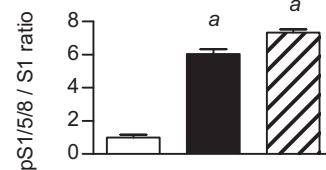

C

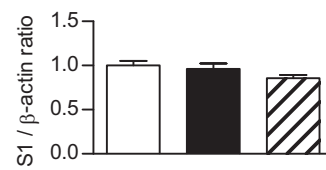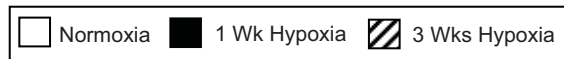

Supplement: supp_00866.2009_regu-figS8.pdf [file supp_00866.2009_regu-figS8.pdf]
